# Supplementary material
Source: publisher figshare collection journal article supplement (https://acs.figshare.com/ndownloader/files/4143841)
Supplement: Supplementary file 1 [file 4143841]

# Utilizing Photocurrent Transients for Dithiolene-Based Photodetection: Stepwise Improvements at Communications Relevant Wavelengths

Simon Dalgleish, Michio M. Matsushita, Laigui Hu, Bo Li, Hirofumi Yoshikawa,  
Kunio Awaga

## Supplementary Information

### SEM Images

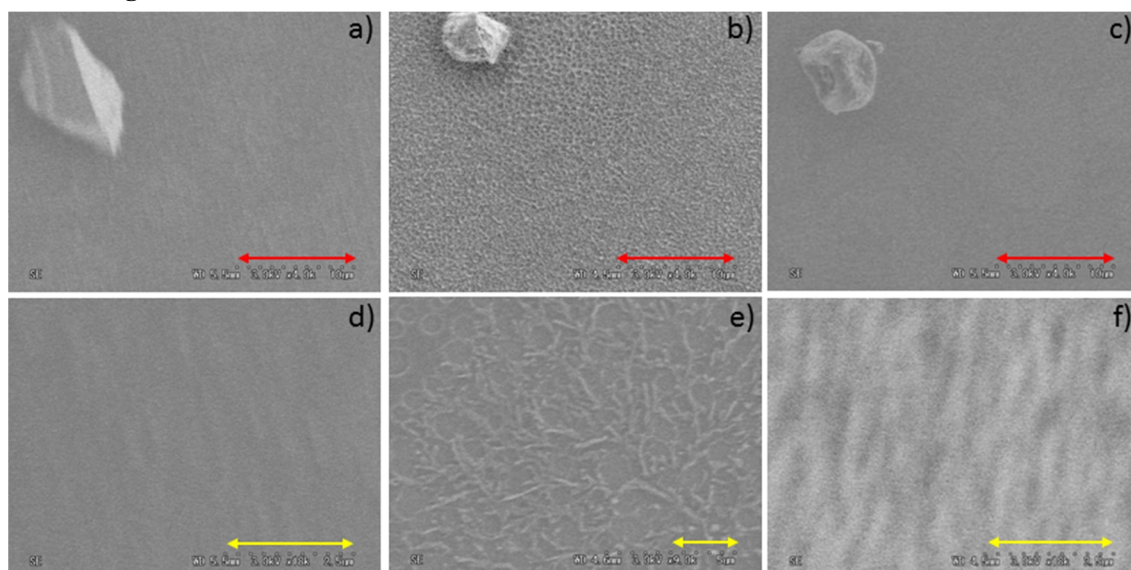

**Figure S1:** SEM images of spin-cast films of BDN in 1,1,2-TCE (10mg/ml) on ITO coated glass at low (a-c) and high (d-f) magnification, spun at a,d) 1000rpm; b,e) 500rpm; c,f) 1000rpm as blend with 1mg/ml carbon black. For low magnification, defects were deliberately found for contrast. Red scale bar depicts 10  $\mu\text{m}$ , yellow scale bar depicts 2.5  $\mu\text{m}$ .

### Current/Voltage Measurements

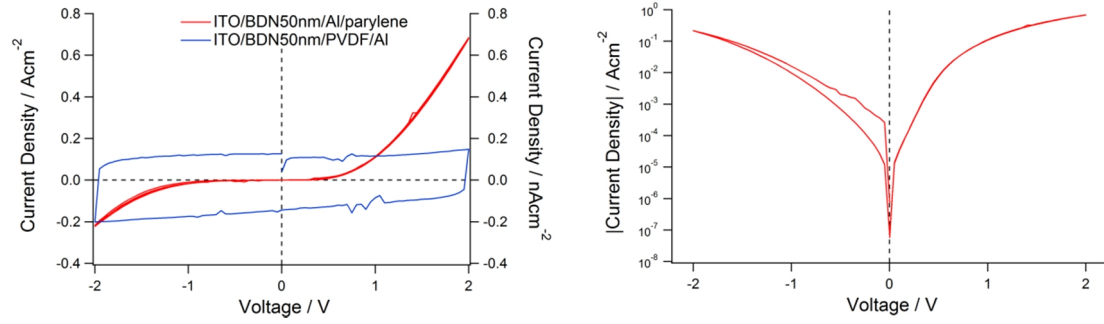

**Figure S2:** (left) Current/Voltage measurements of parylene-coated Schottky-type device of structure ITO/BDN50nm/Al, compared to transient-type device of structure ITO/BDN50nm/PVDF/Al, tested in air in the absence of light; (right) log plot of Schottky-type device, showing larger dark current ( $J_d = 70 \text{ nA cm}^{-2}$ ), compared to transient-type device ( $J_d = 40 \text{ pA cm}^{-2}$ ) at zero applied bias.
